# Supplementary material for: Site-specifically labeled 89Zr-DFO-trastuzumab improves immuno-reactivity and tumor uptake for immuno-PET in a subcutaneous HER2-positive xenograft mouse model
Source: PubMed Central journal article supplement — Theranostics. 2019 Jun 9;9(15):4409–20. doi: 10.7150/thno.32883 (PMC6599660; doi:10.7150/thno.32883), 2019-06-09
Supplement: thnov09p4409s1.pdf [file thnov09p4409s1.pdf]

## Supplementary

Figure S1

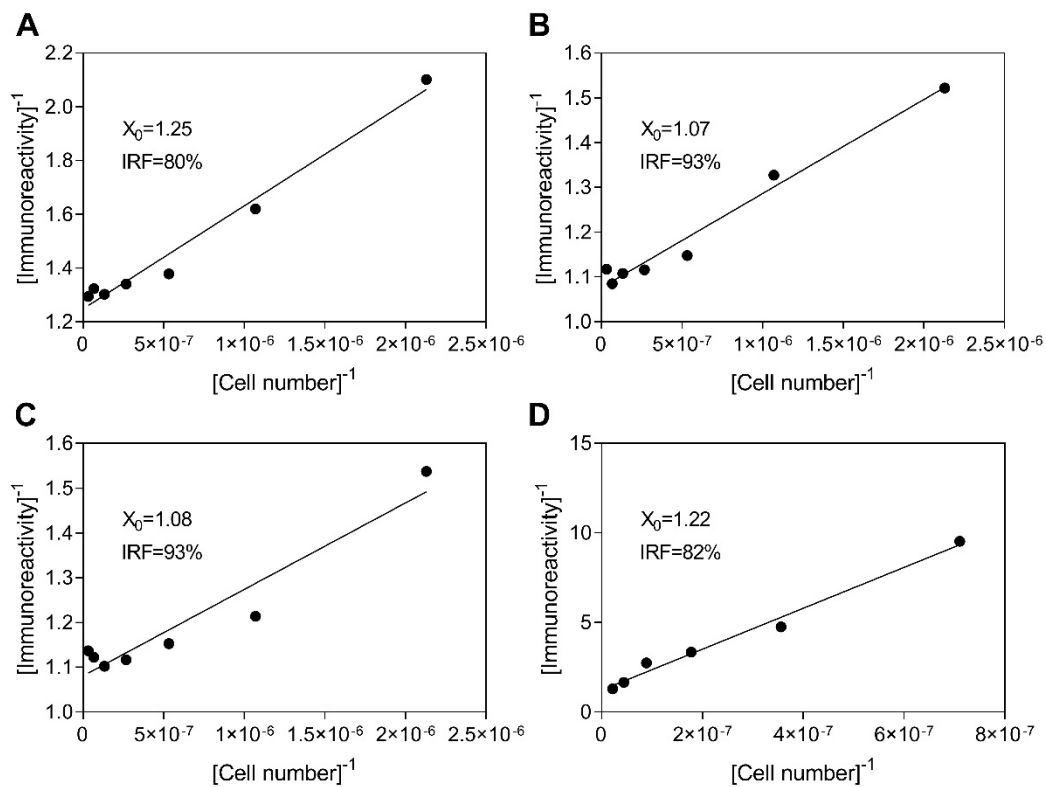

**Figure S1: Immuno-reactive fraction assay of <sup>89</sup>Zr-DFO-trastuzumab.** Immuno-reactive fraction of random (A),  $\beta$ -Gal (B), endoS2 (C) and endoS2-R (D) labeled <sup>89</sup>Zr-DFO-trastuzumab incubated with SK-OV-3 cells.

Figure S2

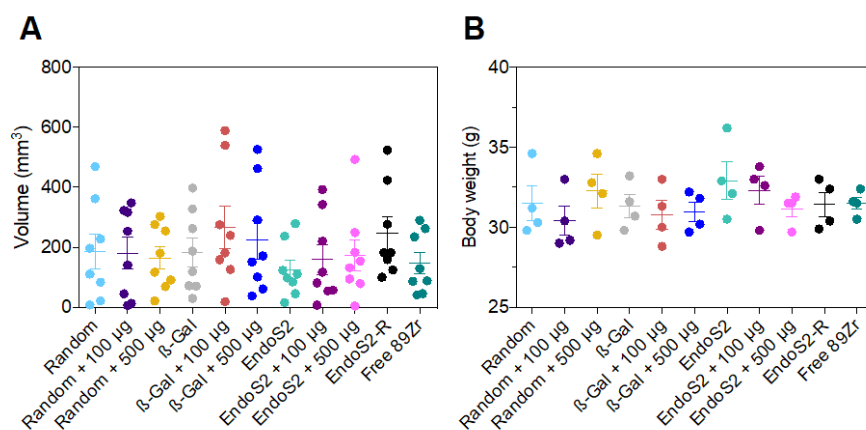

**Figure S2: Randomization of animals for the <sup>89</sup>Zr-DFO-trastuzumab imaging and biodistribution study.** Tumor volumes (A) and body weight (B) of mice at the day of randomization. No differences in tumor volume ( $p=0.7331$ ) and body weight ( $p=0.6793$ ) were found between groups.

**Figure S3**

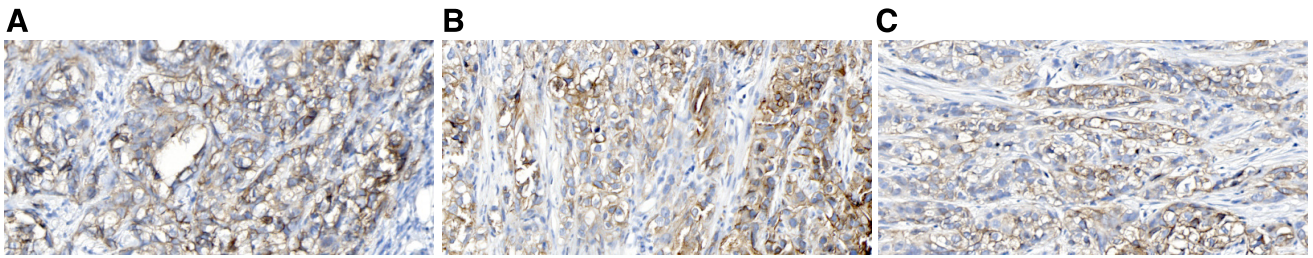

**Figure S3: Immunohistochemical (IHC) analysis of HER2 expression.** *Ex vivo* IHC analysis of HER2 expression in SK-OV-3 tumor-bearing mice receiving random (A),  $\beta$ -Gal (B) or endoS2 (C) modified  $^{89}\text{Zr}$ -DFO-trastuzumab.

**Figure S4**

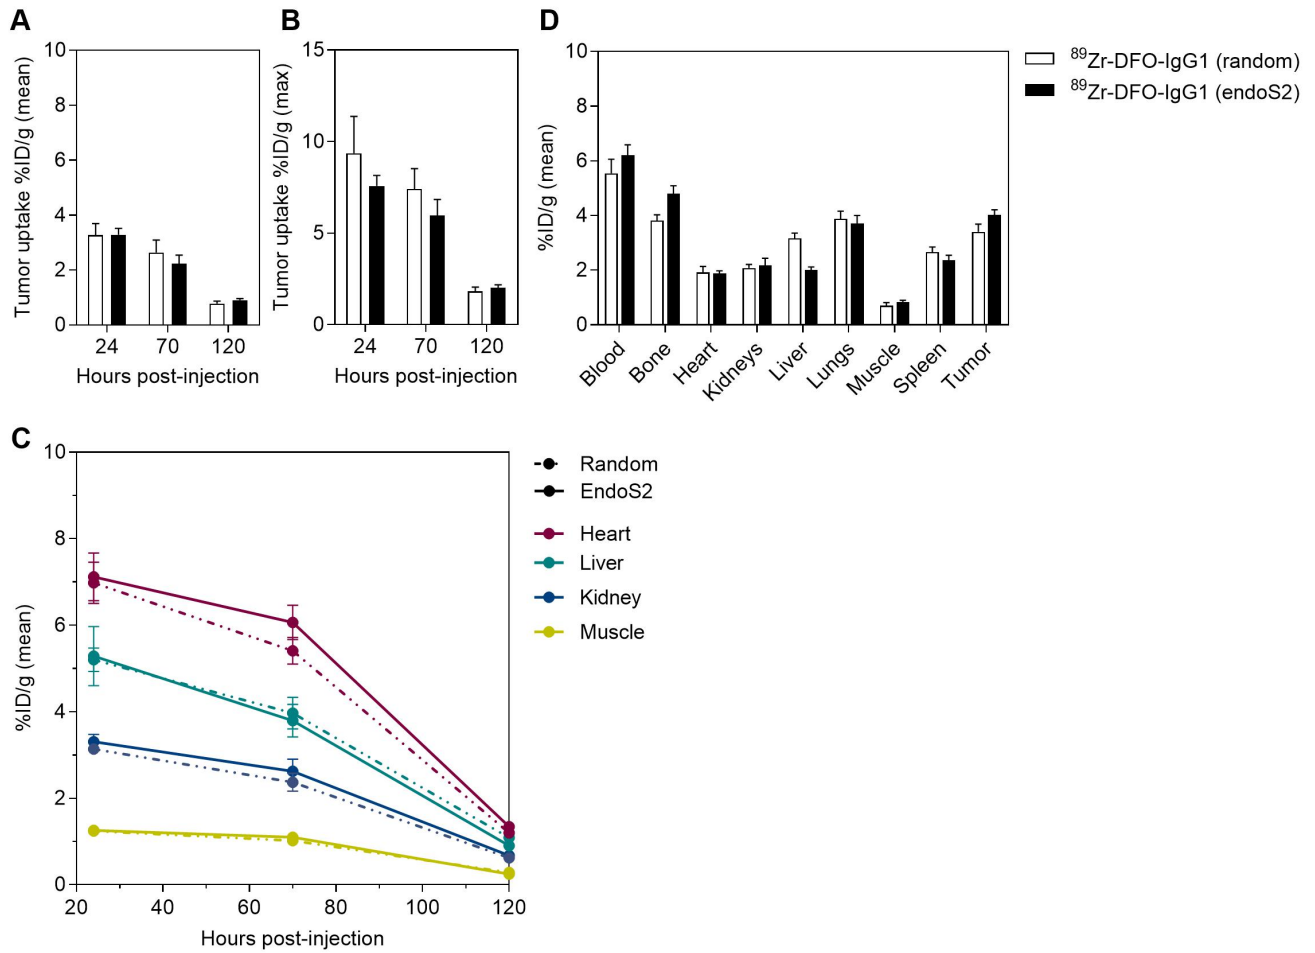

**Figure S4: Isotype control PET/CT imaging and biodistribution in SK-OV-3 tumor-bearing mice.** Mean (A) and maximum (B) tumor uptake 24, 70 and 120 hours post-injection of random and endoS2 modified  $^{89}\text{Zr}$ -DFO-IgG1. (C) Image-derived biodistribution of  $^{89}\text{Zr}$ -DFO-IgG1 in major organs over the imaging time-course. (D) *Ex vivo* biodistribution 120 hours after injection of  $^{89}\text{Zr}$ -DFO-IgG1. N=4/tracer for all experiments.

**Table S1: Ex vivo biodistribution tumor-to-background ratios**

|                 | Co-injection | <sup>89</sup> Zr-DFO-trastuzumab |            |            |
|-----------------|--------------|----------------------------------|------------|------------|
|                 |              | Random                           | β-Gal      | EndoS2     |
| Tumor-to-blood  | 0            | 5.1 ± 0.4                        | 9.8 ± 1.1  | 8.1 ± 1.0  |
|                 | 100 µg       | 6.5 ± 0.5                        | 8.3 ± 1.3  | 5.7 ± 0.7  |
|                 | 500 µg       | 3.3 ± 0.2                        | 3.9 ± 0.3  | 4.0 ± 0.2  |
| Tumor-to-muscle | 0            | 23.3 ± 2.7                       | 31.5 ± 4.8 | 49.9 ± 6.3 |
|                 | 100 µg       | 21.4 ± 2.2                       | 34.5 ± 3.6 | 32.2 ± 4.2 |
|                 | 500 µg       | 23.2 ± 1.4                       | 31.0 ± 4.0 | 27.7 ± 4.1 |

Values are mean ± SEM
